CORRECTION

## Correction: Correction: Quantifying microbial interactions based on compositional data using an iterative approach for solving generalized Lotka-Volterra equations

The *PLOS Computational Biology* Staff

### Notice of Republication

This article was republished on 29<sup>th</sup> January 2026 to include references [1] & [2] which were missing from the original correction.

The publisher apologizes for the errors. Please download this article again to view the correct version. The originally published, uncorrected article and the republished, corrected articles are provided here for reference.

### Supporting information

**S1 File. Originally published, uncorrected article correction.**

(PDF)

**S2 File. Republished, corrected article correction.**

(PDF)

### Reference

1. Sun F, Huang Y, Tang T, Dai X. Correction: Quantifying microbial interactions based on compositional data using an iterative approach for solving generalized Lotka-Volterra equations. *PLoS Comput Biol*. 2026;22(1):e1013876. <https://doi.org/10.1371/journal.pcbi.1013876> PMID: [41493933](https://pubmed.ncbi.nlm.nih.gov/41493933/)

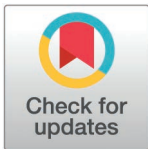

### OPEN ACCESS

**Citation:** The *PLOS Computational Biology* Staff (2026) Correction: Correction: Quantifying microbial interactions based on compositional data using an iterative approach for solving generalized Lotka-Volterra equations. *PLoS Comput Biol* 22(2): e1013971. <https://doi.org/10.1371/journal.pcbi.1013971>

**Published:** February 13, 2026

**Copyright:** © 2026 The *PLOS Computational Biology* Staff. This is an open access article distributed under the terms of the [Creative Commons Attribution License](https://creativecommons.org/licenses/by/4.0/), which permits unrestricted use, distribution, and reproduction in any medium, provided the original author and source are credited.
